# Supplementary material
Source: PubMed Central journal article supplement (PMC4319542)
Supplement: NIHMS657771-supplement-4.pdf [file NIHMS657771-supplement-4.pdf]

## Supplemental Information:

## Supplemental Data:

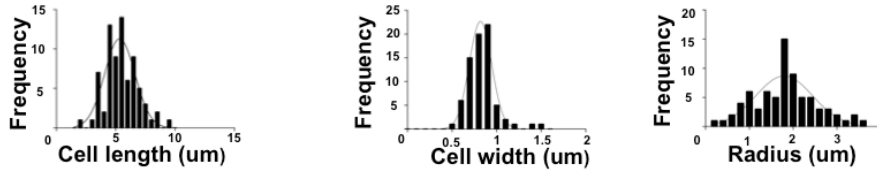

**Figure S1.** Distributions for cell length, cell width and radius of trajectory for the tethered cells described in Figure 2 of the main text. Individual values of cell length, cell width and radius of trajectory were used to calculate motor torque shown in Figure 2D in the main text.
